# Supplementary material for: Silver(I) carboxylates: versatile inorganic analogs of carboxylic acids for supramolecular network formation.
Source: Royal Society of Chemistry journal article supplement (doi:10.1039/b108448h), 2001-11-15
Supplement: b108448h.pdf [file b108448h.pdf]

## Supporting Information

### **Silver(I) carboxylates: versatile inorganic analogs of carboxylic acids for supramolecular network formation.**

Lee Brammer,<sup>\*,†</sup> Michael D. Burgard, Colin S. Rodger, John K. Swearingen and Nigam P. Rath  
*Department of Chemistry and Biochemistry, University of Missouri-St. Louis, 8001 Natural  
Bridge Road, St. Louis, MO 63121-4499, USA*

#### Experimental, Characterization and Crystallographic Data

Figure S1. View of **1** showing components of SBU and bridging mode of carboxylate ligand (30% probability ellipsoids).

Figure S2. View of **2** showing components of SBU and bridging mode of carboxylate ligand (30% probability ellipsoids).

Fig S3a. View of **3** showing components of SBU, bridging mode of carboxylate ligand and disordered CF<sub>3</sub> groups (30% probability ellipsoids).

Fig S3b. View of **3** showing extended silver carboxylate linkage that connects the layers built up from the SBU.

Full crystallographic data for compounds **1-3** in CIF format as a separate file.

---

<sup>†</sup> Current address: Department of Chemistry, University of Sheffield, Sheffield S3 7HF, UK.  
Email: lee.brammer@sheffield.ac.uk

### Crystal Syntheses and Characterization

**Ag(CF<sub>3</sub>COO)(DABCO) 1:** Ag(CF<sub>3</sub>COO) (28.0 mg, 0.127 mmol) in ethanol (4 mL) was added to DABCO (14.2 mg, 0.127 mmol) in ethanol (4 mL). White powder formed rapidly and was redissolved upon addition of 0.9M aqueous NH<sub>3</sub> (4 mL). Colorless crystals of **1** (13.5 mg, yield 32.0 %) resulted after 18 days. Partial decomposition (Ag(I) reduction) prevented satisfactory elemental and powder diffraction analysis. **Ag(CF<sub>3</sub>COO)(TMP) 2\*:** Ag(CF<sub>3</sub>COO) (35.2 mg, 0.159 mmol) in ethanol (4 mL) was added to tetramethylpyrazine (TMP) (21.7 mg, 0.159 mmol) in toluene (4 mL). Colorless crystals of **2** (41.2 mg, yield 72.4 %) resulted after 7 days. Calcd: C, 33.64; H, 3.39; N, 7.85%; found: C, 33.73; H, 3.43 N, 7.57%. **Ag(CF<sub>3</sub>COO)(pyraz) 3\*:** Ag(CF<sub>3</sub>COO) (34.0 mg, 0.154 mmol) in ethanol (4 mL) was added to pyrazine (12.2 mg, 0.153 mmol) in ethanol (6 mL). Colorless crystals of **3** (28.6 mg, yield 61.9 %) resulted after 11 days. Calcd: C, 23.94; H, 1.34; N, 9.31%; found: C, 24.07; H, 1.35 N, 9.11%. Crystals were grown by slow evaporation at ca. 22 °C. \*Powder diffraction patterns (bulk samples) consistent with calculated patterns.

### Crystal Data

**1** Rectangular rods;  $M = 333.07$ , orthorhombic,  $Cmca$ ,  $a = 12.5745(2)$ ,  $b = 12.3972(2)$ ,  $c = 14.2861(2)$  Å,  $U = 2227.04(6)$  Å<sup>3</sup>,  $Z = 8$ ,  $D_c = 1.987$  Mg m<sup>-3</sup>,  $T = 223(5)$  K;  $R_1(F) = 0.037$ ,  $wR_2(F^2) = 0.091$ ,  $S(F^2) = 1.12$  for  $1591 F^2 > 2\sigma(F^2)$ . **2** Hexagonal plates;  $M = 357.09$ , triclinic,  $P-1$ ,  $a = 9.0587(2)$ ,  $b = 9.1231(2)$ ,  $c = 9.6097(2)$  Å,  $\alpha = 117.553(1)$ ,  $\beta = 116.433(1)$ ,  $\gamma = 91.471(3)$  °,  $U = 603.07(2)$  Å<sup>3</sup>,  $Z = 2$ ,  $D_c = 1.966$  Mg m<sup>-3</sup>,  $T = 223(5)$  K;  $R_1(F) = 0.021$ ,  $wR_2(F^2) = 0.051$ ,  $S(F^2) = 1.05$  for  $2874 F^2 > 2\sigma(F^2)$ . **3** Multifaceted blocks,  $M = 300.98$ , monoclinic,  $C2/c$ ,  $a = 12.766(2)$ ,  $b = 10.141(2)$ ,  $c = 7.008(1)$  Å,  $\beta = 102.030(3)$  °,  $U = 887.3(2)$  Å<sup>3</sup>,  $Z = 4$ ,  $D_c = 2.253$  Mg m<sup>-3</sup>,  $T = 296(2)$  K;  $R_1(F) = 0.024$ ,  $wR_2(F^2) = 0.072$ ,  $S(F^2) = 1.41$  for  $1215 F^2 > 2\sigma(F^2)$ . CCDC nos.171148 - 171150.

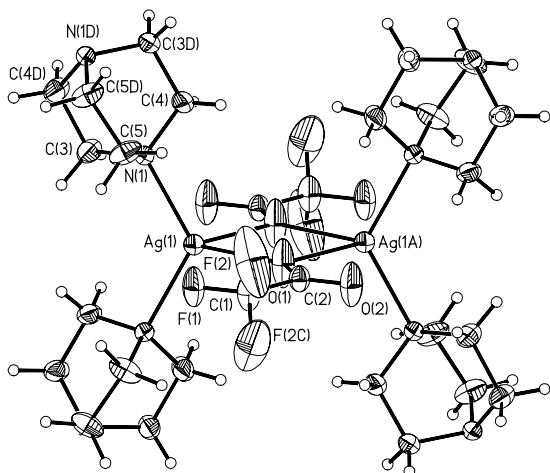

Fig S1. View of **1** showing components of SBU and bridging mode of carboxylate ligand (30% probability ellipsoids).

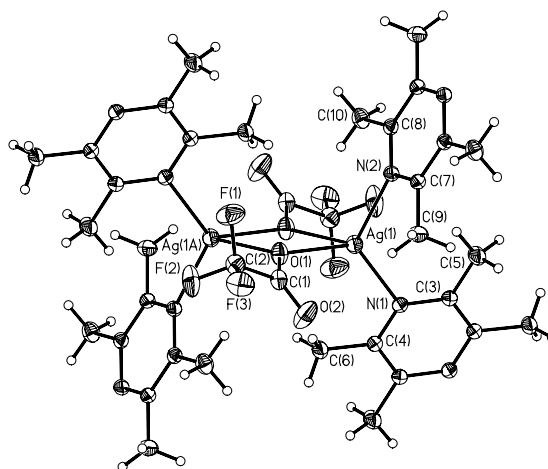

Fig S2. View of **2** showing components of SBU and bridging mode of carboxylate ligand (30% probability ellipsoids).

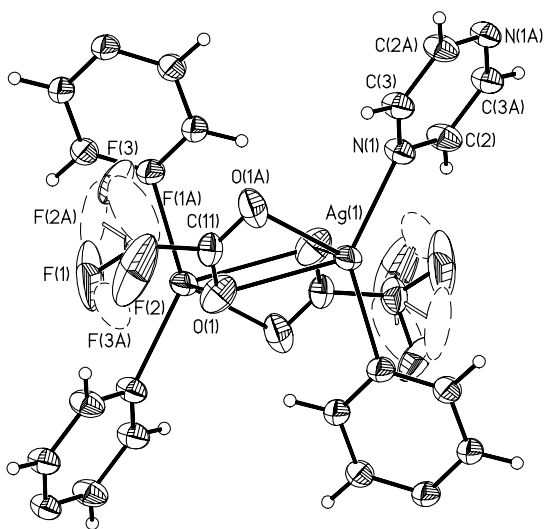

Fig S3a. View of **3** showing components of SBU, bridging mode of carboxylate ligand and disordered  $\text{CF}_3$  groups (30% probability ellipsoids).

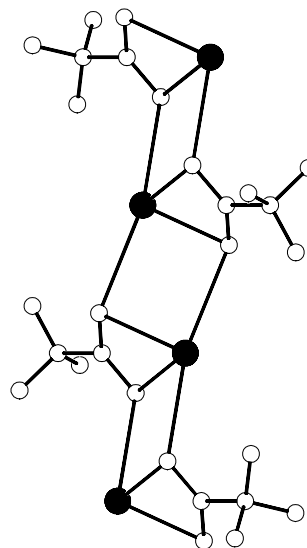

Fig S3b. View of **3** showing extended silver carboxylate linkage that connects the layers built up from the SBU.
